# Supplementary material
Source: MDPI journal article supplement (https://www.mdpi.com/2227-7072/12/1/29)
Supplement: s1 [file s1]

Archive with 1 entries (1 files):
- ijfs-2816623-supplementary.pdf
